# Supplementary material for: Genetically unmatched human iPSC and ESC exhibit equivalent gene expression and neuronal differentiation potential
Source: PubMed Central journal article supplement (PMC5727499; doi:10.1038/s41598-017-17882-1), 2017-12-13
Supplement: 41598_2017_17882_MOESM3_ESM.pdf [file 41598_2017_17882_MOESM3_ESM.pdf]

**Genetically unmatched human iPSC and ESC exhibit equivalent gene expression and neuronal differentiation potential**

*Hany E. Marei<sup>1</sup>, Althani A<sup>1,2</sup>, Lashen S<sup>3</sup>, Cenciarelli C<sup>4</sup> and Anwarul Hasan<sup>5</sup>*

*<sup>1</sup> Biomedical Research Center, Qatar University, Doha, PO Box 2713, Qatar, <sup>2</sup>Department of Health Sciences, College of Health Sciences, Qatar University, Doha 2713, Qatar, <sup>3</sup>Department of Cytology and Histology, Faculty of Veterinary Medicine, Mansoura University, Mansoura, Egypt,*

*<sup>4</sup>Institute of Translational Pharmacology-CNR, Roma, Italy, <sup>5</sup>Department of Mechanical and Industrial Engineering, Qatar University, Doha, Qatar.*

**Supplementary Tables**

**Supplementary Table 1:** Human iPSC/ESC and dermal fibroblast RNA samples used in the microarray analysis.

| <b>Cell Line</b>          | <b>Cell Type</b> | <b>RNA ng/ul</b> | <b>Group</b> |
|---------------------------|------------------|------------------|--------------|
| SC194.1-SF5-2I4.M18S6     | iPSC             | 701.34           | Group 1 iPSC |
| SC158.1-SF4-2I3.M15S8--S3 | iPSC             | 1860.65          | Group 1 iPSC |
| SC65.1-UH0-2I0.M0S6--S6   | iPSC             | 283.57           | Group 1 iPSC |
| CLG-22506Male (iXcell)    | iPSC             | 509.26           | Group 1 iPSC |
| CLG-22508Male (iXcell)    | iPSC             | 726.27           | Group 1 iPSC |
| BG01.1-M40S9              | HESC             | 313.19           | Group 2 ESC  |
| BG03.1-M41S13             | HESC             | 321.22           | Group 2 ESC  |
| CLG-25440                 | HESC             | 303.30           | Group 2 ESC  |
| SC158.1-SF5               | HDF              | 137.07           | Control      |
| SC194.1-SF3               | HDF              | 150.47           | Control      |
| SC190.1-SF3               | HDF              | 120.24           | Control      |

**Supplementary Table 2:** Gene ontology (GO) analysis (Biological Process) of differentially expressed genes between iPSCs and fibroblasts.

| <b>Term</b>                              | <b>Count</b> | <b>%</b> | <b>P Value</b> |
|------------------------------------------|--------------|----------|----------------|
| GO:0006259~DNA metabolic process         | 140          | 8.70     | 1.94E-37       |
| GO:0000279~M phase                       | 103          | 6.40     | 2.37E-32       |
| GO:0022403~cell cycle phase              | 117          | 7.27     | 3.92E-32       |
| GO:0007049~cell cycle                    | 167          | 10.37    | 3.30E-30       |
| GO:0006260~DNA replication               | 74           | 4.60     | 4.63E-30       |
| GO:0022402~cell cycle process            | 134          | 8.32     | 2.00E-28       |
| GO:0000280~nuclear division              | 77           | 4.78     | 1.01E-27       |
| GO:0007067~mitosis                       | 77           | 4.78     | 1.01E-27       |
| GO:0000087~M phase of mitotic cell cycle | 77           | 4.78     | 3.83E-27       |
| GO:0048285~organelle fission             | 77           | 4.78     | 1.92E-26       |

GO analysis (BP) of upregulated genes in iPSCs

| <b>Term</b>                                             | <b>Count</b> | <b>%</b> | <b>P Value</b> |
|---------------------------------------------------------|--------------|----------|----------------|
| GO:0016192~vesicle-mediated transport                   | 91           | 6.93     | 1.20E-13       |
| GO:0008104~protein localization                         | 114          | 8.68     | 5.60E-11       |
| GO:0045184~establishment of protein localization        | 103          | 7.84     | 7.51E-11       |
| GO:0015031~protein transport                            | 102          | 7.77     | 9.45E-11       |
| GO:0048193~Golgi vesicle transport                      | 32           | 2.44     | 8.99E-10       |
| GO:0042127~regulation of cell proliferation             | 99           | 7.54     | 5.52E-09       |
| GO:0051094~positive regulation of developmental process | 48           | 3.66     | 8.62E-09       |
| GO:0016044~membrane organization                        | 59           | 4.49     | 8.93E-09       |
| GO:0046907~intracellular transport                      | 86           | 6.55     | 1.07E-08       |

GO:0007264~small GTPase mediated signal transduction 49 3.73 6.15E-08

GO analysis (BP) of downregulated genes in iPSCs

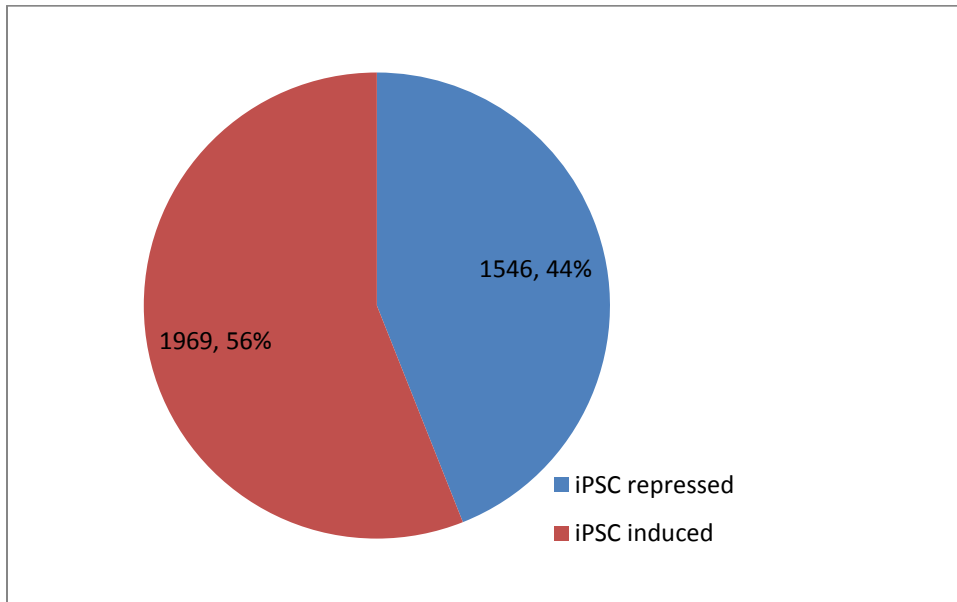

**n=3,515**

**Supplementary Table 3:** Gene ontology (GO) analysis (Biological Process) of differentially expressed genes between human ESCs and fibroblasts.

| Term                                     | Count | %     | P Value  |
|------------------------------------------|-------|-------|----------|
| GO:0006259~DNA metabolic process         | 127   | 8.20  | 1.12E-31 |
| GO:0000279~M phase                       | 95    | 6.14  | 1.26E-28 |
| GO:0007049~cell cycle                    | 157   | 10.14 | 7.52E-28 |
| GO:0022403~cell cycle phase              | 106   | 6.85  | 3.60E-27 |
| GO:0006260~DNA replication               | 68    | 4.39  | 1.73E-26 |
| GO:0022402~cell cycle process            | 125   | 8.07  | 1.03E-25 |
| GO:0000280~nuclear division              | 71    | 4.59  | 1.39E-24 |
| GO:0007067~mitosis                       | 71    | 4.59  | 1.39E-24 |
| GO:0000087~M phase of mitotic cell cycle | 71    | 4.59  | 4.57E-24 |

GO:0048285~organelle fission 71 4.59 1.93E-23

---

GO analysis (BP) of upregulated genes in hESCs

| Term                                                    | Count | %    | P Value  |
|---------------------------------------------------------|-------|------|----------|
| GO:0016192~vesicle-mediated transport                   | 92    | 6.71 | 1.49E-12 |
| GO:0045184~establishment of protein localization        | 105   | 7.66 | 5.07E-10 |
| GO:0008104~protein localization                         | 116   | 8.46 | 5.24E-10 |
| GO:0015031~protein transport                            | 104   | 7.59 | 6.27E-10 |
| GO:0001944~vasculature development                      | 47    | 3.43 | 5.88E-09 |
| GO:0001568~blood vessel development                     | 46    | 3.36 | 8.03E-09 |
| GO:0042127~regulation of cell proliferation             | 102   | 7.44 | 1.52E-08 |
| GO:0051270~regulation of cell motion                    | 39    | 2.84 | 1.70E-08 |
| GO:0051094~positive regulation of developmental process | 49    | 3.57 | 2.01E-08 |
| GO:0046907~intracellular transport                      | 88    | 6.42 | 3.93E-08 |

---

GO analysis (BP) of downregulated genes in hESCs

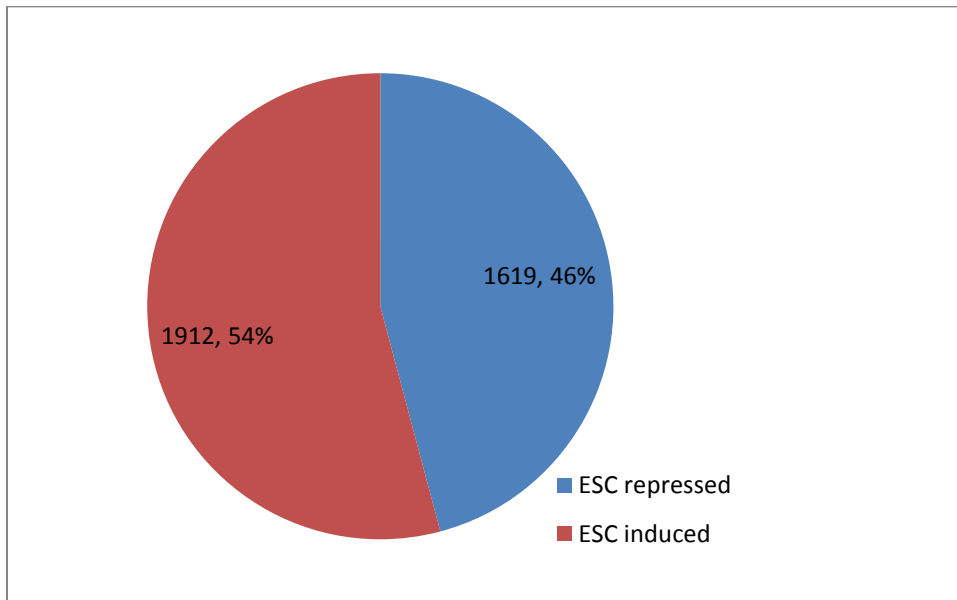

**n=3,531**

**Supplementary Table 4:** Gene ontology (GO) analysis (Biological Process) of the common induced genes in human iPSC/ESC lines.

| Term                                     | Count | %     | P Value  |
|------------------------------------------|-------|-------|----------|
| GO:0006259~DNA metabolic process         | 123   | 8.86  | 3.50E-33 |
| GO:0000279~M phase                       | 94    | 6.77  | 4.54E-31 |
| GO:0007049~cell cycle                    | 153   | 11.02 | 2.38E-30 |
| GO:0022403~cell cycle phase              | 105   | 7.56  | 6.46E-30 |
| GO:0006260~DNA replication               | 68    | 4.90  | 7.21E-29 |
| GO:0022402~cell cycle process            | 122   | 8.79  | 8.84E-28 |
| GO:0000280~nuclear division              | 71    | 5.12  | 5.34E-27 |
| GO:0007067~mitosis                       | 71    | 5.12  | 5.34E-27 |
| GO:0000087~M phase of mitotic cell cycle | 71    | 5.12  | 1.81E-26 |
| GO:0048285~organelle fission             | 71    | 5.12  | 7.95E-26 |

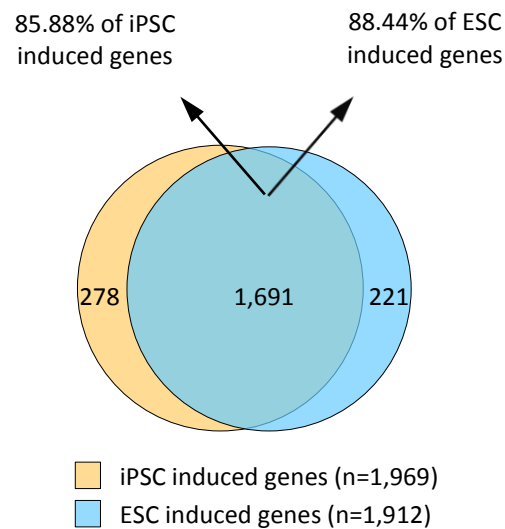

**Supplementary Table 5:** Gene ontology (GO) analysis (Biological Process) of the common repressed genes in human iPSC/ESC lines.

| Term                                                    | Count | %    | P Value  |
|---------------------------------------------------------|-------|------|----------|
| GO:0016192~vesicle-mediated transport                   | 82    | 7.11 | 1.54E-12 |
| GO:0045184~establishment of protein localization        | 95    | 8.23 | 7.60E-11 |
| GO:0015031~protein transport                            | 94    | 8.15 | 1.08E-10 |
| GO:0008104~protein localization                         | 104   | 9.01 | 1.30E-10 |
| GO:0051094~positive regulation of developmental process | 44    | 3.81 | 1.97E-08 |
| GO:0007264~small GTPase mediated signal transduction    | 46    | 3.99 | 4.02E-08 |
| GO:0046907~intracellular transport                      | 77    | 6.67 | 6.23E-08 |
| GO:0051270~regulation of cell motion                    | 34    | 2.95 | 8.03E-08 |
| GO:0048193~Golgi vesicle transport                      | 27    | 2.34 | 9.19E-08 |
| GO:0001568~blood vessel development                     | 39    | 3.38 | 1.22E-07 |

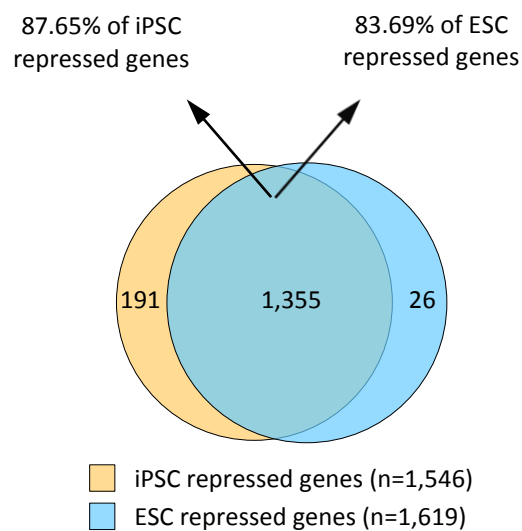

**Supplementary Table 6:** Gene ontology (GO) analysis (Pathway) of differentially expressed genes between iPSCs and fibroblasts.

| Category     | Term                                                | Count | %    | P Value  |
|--------------|-----------------------------------------------------|-------|------|----------|
| KEGG_PATHWAY | hsa03030:DNA replication                            | 24    | 1.49 | 9.98E-17 |
| KEGG_PATHWAY | hsa03040:Spliceosome                                | 44    | 2.73 | 1.36E-16 |
| KEGG_PATHWAY | hsa04110:Cell cycle                                 | 35    | 2.17 | 3.50E-10 |
| KEGG_PATHWAY | hsa03410:Base excision repair                       | 17    | 1.06 | 4.86E-09 |
| KEGG_PATHWAY | hsa03430:Mismatch repair                            | 13    | 0.81 | 6.75E-08 |
| KEGG_PATHWAY | hsa03018:RNA degradation                            | 17    | 1.06 | 1.20E-05 |
| KEGG_PATHWAY | hsa00280:Valine, leucine and isoleucine degradation | 13    | 0.81 | 2.02E-04 |
| KEGG_PATHWAY | hsa03420:Nucleotide excision repair                 | 13    | 0.81 | 2.02E-04 |
| KEGG_PATHWAY | hsa00100:Steroid biosynthesis                       | 8     | 0.50 | 2.75E-04 |
| KEGG_PATHWAY | hsa00970:Aminoacyl-tRNA biosynthesis                | 12    | 0.75 | 4.34E-04 |

GO analysis (Pathway) of upregulated genes in iPSCs

| Category     | Term                                      | Count | %    | P Value  |
|--------------|-------------------------------------------|-------|------|----------|
| KEGG_PATHWAY | hsa04142:Lysosome                         | 37    | 2.82 | 8.71E-13 |
| KEGG_PATHWAY | hsa04510:Focal adhesion                   | 49    | 3.73 | 4.46E-12 |
| KEGG_PATHWAY | hsa00531:Glycosaminoglycan degradation    | 9     | 0.69 | 1.57E-04 |
| KEGG_PATHWAY | hsa05212:Pancreatic cancer                | 17    | 1.29 | 1.91E-04 |
| KEGG_PATHWAY | hsa04512:ECM-receptor interaction         | 18    | 1.37 | 4.00E-04 |
| KEGG_PATHWAY | hsa04144:Endocytosis                      | 30    | 2.28 | 4.57E-04 |
| KEGG_PATHWAY | hsa04810:Regulation of actin cytoskeleton | 32    | 2.44 | 0.001376 |
| KEGG_PATHWAY | hsa05223:Non-small cell lung cancer       | 12    | 0.91 | 0.003947 |
| KEGG_PATHWAY | hsa04722:Neurotrophin signaling pathway   | 20    | 1.52 | 0.005869 |



GO analysis (Pathway) of downregulated genes in iPSCs

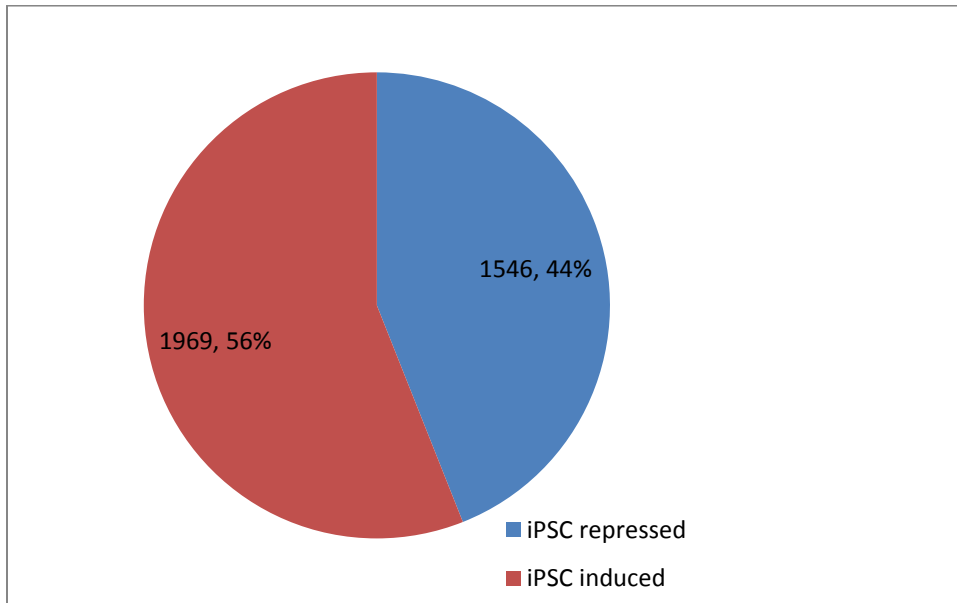

**n=3,515**

**Supplementary Table 7:** Gene ontology (GO) analysis (Pathway) of differentially expressed genes between human ESCs and fibroblasts.

| Category     | Term                                                | Count | %    | P Value  |
|--------------|-----------------------------------------------------|-------|------|----------|
| KEGG_PATHWAY | hsa03030:DNA replication                            | 23    | 1.49 | 6.09E-16 |
| KEGG_PATHWAY | hsa03040:Spliceosome                                | 38    | 2.45 | 8.96E-13 |
| KEGG_PATHWAY | hsa04110:Cell cycle                                 | 34    | 2.20 | 3.78E-10 |
| KEGG_PATHWAY | hsa03410:Base excision repair                       | 15    | 0.97 | 1.84E-07 |
| KEGG_PATHWAY | hsa03430:Mismatch repair                            | 12    | 0.78 | 4.45E-07 |
| KEGG_PATHWAY | hsa00230:Purine metabolism                          | 27    | 1.74 | 1.76E-04 |
| KEGG_PATHWAY | hsa00100:Steroid biosynthesis                       | 8     | 0.52 | 1.98E-04 |
| KEGG_PATHWAY | hsa03420:Nucleotide excision repair                 | 12    | 0.78 | 5.35E-04 |
| KEGG_PATHWAY | hsa00280:Valine, leucine and isoleucine degradation | 12    | 0.78 | 5.35E-04 |
| KEGG_PATHWAY | hsa04114:Oocyte meiosis                             | 20    | 1.29 | 0.001062 |

GO analysis (Pathway) of upregulated genes in ESCs

| Category     | Term                                      | Count | %    | P Value  |
|--------------|-------------------------------------------|-------|------|----------|
| KEGG_PATHWAY | hsa04510:Focal adhesion                   | 50    | 3.65 | 3.06E-12 |
| KEGG_PATHWAY | hsa04142:Lysosome                         | 32    | 2.33 | 4.37E-09 |
| KEGG_PATHWAY | hsa04144:Endocytosis                      | 32    | 2.33 | 1.35E-04 |
| KEGG_PATHWAY | hsa04512:ECM-receptor interaction         | 19    | 1.39 | 1.76E-04 |
| KEGG_PATHWAY | hsa05212:Pancreatic cancer                | 16    | 1.17 | 8.28E-04 |
| KEGG_PATHWAY | hsa00531:Glycosaminoglycan degradation    | 8     | 0.58 | 0.001218 |
| KEGG_PATHWAY | hsa04810:Regulation of actin cytoskeleton | 32    | 2.33 | 0.002084 |
| KEGG_PATHWAY | hsa04722:Neurotrophin signaling pathway   | 21    | 1.53 | 0.003509 |
| KEGG_PATHWAY | hsa04210:Apoptosis                        | 16    | 1.17 | 0.005804 |

|              |                            |    |      |          |
|--------------|----------------------------|----|------|----------|
| KEGG_PATHWAY | hsa05210:Colorectal cancer | 15 | 1.09 | 0.010211 |
|--------------|----------------------------|----|------|----------|

---

GO analysis (Pathway) of downregulated genes in ESCs

| Category     | Term                                                | Count | %    | P Value  |
|--------------|-----------------------------------------------------|-------|------|----------|
| KEGG_PATHWAY | hsa03030:DNA replication                            | 23    | 1.49 | 6.09E-16 |
| KEGG_PATHWAY | hsa03040:Spliceosome                                | 38    | 2.45 | 8.96E-13 |
| KEGG_PATHWAY | hsa04110:Cell cycle                                 | 34    | 2.20 | 3.78E-10 |
| KEGG_PATHWAY | hsa03410:Base excision repair                       | 15    | 0.97 | 1.84E-07 |
| KEGG_PATHWAY | hsa03430:Mismatch repair                            | 12    | 0.78 | 4.45E-07 |
| KEGG_PATHWAY | hsa00230:Purine metabolism                          | 27    | 1.74 | 1.76E-04 |
| KEGG_PATHWAY | hsa00100:Steroid biosynthesis                       | 8     | 0.52 | 1.98E-04 |
| KEGG_PATHWAY | hsa03420:Nucleotide excision repair                 | 12    | 0.78 | 5.35E-04 |
| KEGG_PATHWAY | hsa00280:Valine, leucine and isoleucine degradation | 12    | 0.78 | 5.35E-04 |
| KEGG_PATHWAY | hsa04114:Oocyte meiosis                             | 20    | 1.29 | 0.001062 |

---

GO analysis (Pathway) of upregulated genes in ESCs

| Category     | Term                                      | Count | %    | P Value  |
|--------------|-------------------------------------------|-------|------|----------|
| KEGG_PATHWAY | hsa04510:Focal adhesion                   | 50    | 3.65 | 3.06E-12 |
| KEGG_PATHWAY | hsa04142:Lysosome                         | 32    | 2.33 | 4.37E-09 |
| KEGG_PATHWAY | hsa04144:Endocytosis                      | 32    | 2.33 | 1.35E-04 |
| KEGG_PATHWAY | hsa04512:ECM-receptor interaction         | 19    | 1.39 | 1.76E-04 |
| KEGG_PATHWAY | hsa05212:Pancreatic cancer                | 16    | 1.17 | 8.28E-04 |
| KEGG_PATHWAY | hsa00531:Glycosaminoglycan degradation    | 8     | 0.58 | 0.001218 |
| KEGG_PATHWAY | hsa04810:Regulation of actin cytoskeleton | 32    | 2.33 | 0.002084 |
| KEGG_PATHWAY | hsa04722:Neurotrophin signaling pathway   | 21    | 1.53 | 0.003509 |
| KEGG_PATHWAY | hsa04210:Apoptosis                        | 16    | 1.17 | 0.005804 |

---

GO analysis (Pathway) of downregulated genes in ESCs

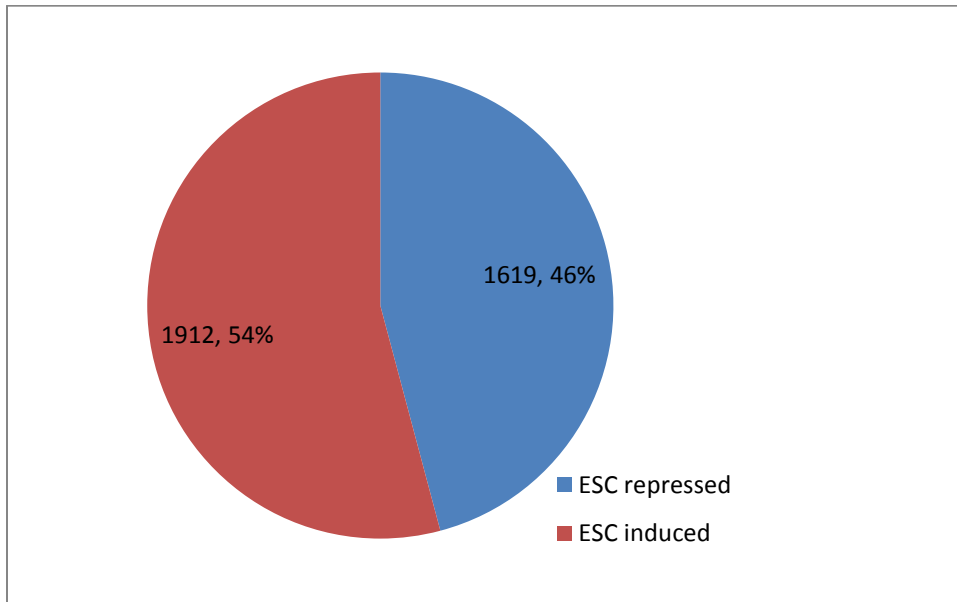

**n=3,531**

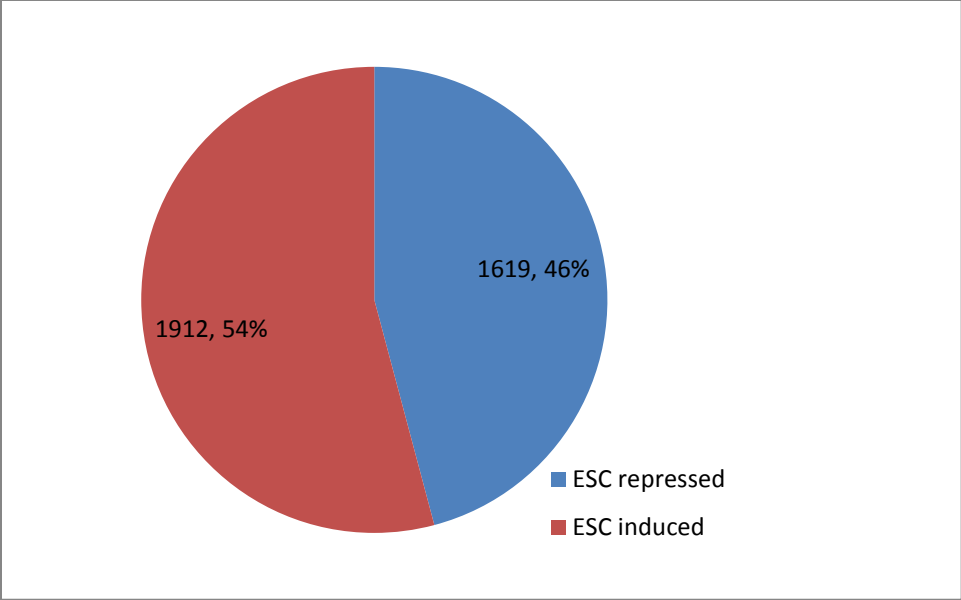

**n=3,531**

**Supplementary Table 8:** Gene ontology (GO) analysis (Pathway) of common induced genes in human iPSCs/ESCs.

| Category     | Term                                                | Count | %    | PValue   |
|--------------|-----------------------------------------------------|-------|------|----------|
| KEGG_PATHWAY | hsa03030:DNA replication                            | 23    | 1.66 | 1.06E-16 |
| KEGG_PATHWAY | hsa03040:Spliceosome                                | 36    | 2.59 | 2.08E-12 |
| KEGG_PATHWAY | hsa04110:Cell cycle                                 | 33    | 2.38 | 2.02E-10 |
| KEGG_PATHWAY | hsa03410:Base excision repair                       | 15    | 1.08 | 6.58E-08 |
| KEGG_PATHWAY | hsa03430:Mismatch repair                            | 12    | 0.86 | 1.93E-07 |
| KEGG_PATHWAY | hsa00100:Steroid biosynthesis                       | 8     | 0.58 | 1.18E-04 |
| KEGG_PATHWAY | hsa00280:Valine, leucine and isoleucine degradation | 12    | 0.86 | 2.64E-04 |
| KEGG_PATHWAY | hsa03420:Nucleotide excision repair                 | 12    | 0.86 | 2.64E-04 |
| KEGG_PATHWAY | hsa04114:Oocyte meiosis                             | 20    | 1.44 | 3.88E-04 |
| KEGG_PATHWAY | hsa00230:Purine metabolism                          | 23    | 1.66 | 0.001831 |

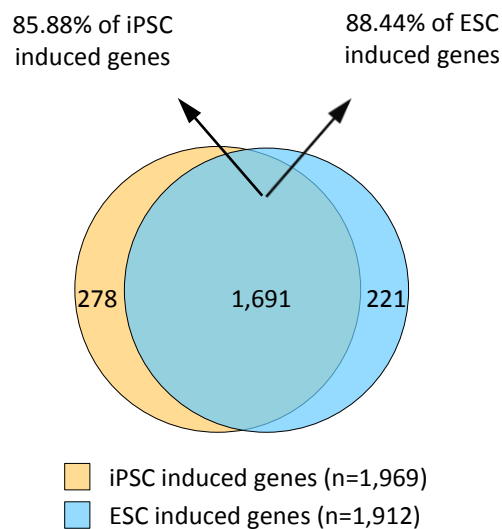

**Supplementary Table 9:** Gene ontology (GO) analysis (Pathway) of common repressed genes in human iPSCs/ESCs.

| Category     | Term                                          | Count | %    | P Value  |
|--------------|-----------------------------------------------|-------|------|----------|
| KEGG_PATHWAY | hsa04510:Focal adhesion                       | 46    | 3.99 | 3.32E-12 |
| KEGG_PATHWAY | hsa04142:Lysosome                             | 32    | 2.77 | 1.08E-10 |
| KEGG_PATHWAY | hsa04144:Endocytosis                          | 30    | 2.60 | 5.43E-05 |
| KEGG_PATHWAY | hsa04512:ECM-receptor interaction             | 18    | 1.56 | 9.20E-05 |
| KEGG_PATHWAY | hsa00531:Glycosaminoglycan degradation        | 8     | 0.69 | 5.01E-04 |
| KEGG_PATHWAY | hsa05212:Pancreatic cancer                    | 15    | 1.30 | 5.86E-04 |
| KEGG_PATHWAY | hsa04810:Regulation of actin cytoskeleton     | 30    | 2.60 | 8.42E-04 |
| KEGG_PATHWAY | hsa04670:Leukocyte transendothelial migration | 18    | 1.56 | 0.005032 |
| KEGG_PATHWAY | hsa05410:Hypertrophic cardiomyopathy (HCM)    | 14    | 1.21 | 0.008197 |
| KEGG_PATHWAY | hsa04666:Fc gamma R-mediated phagocytosis     | 15    | 1.30 | 0.008595 |

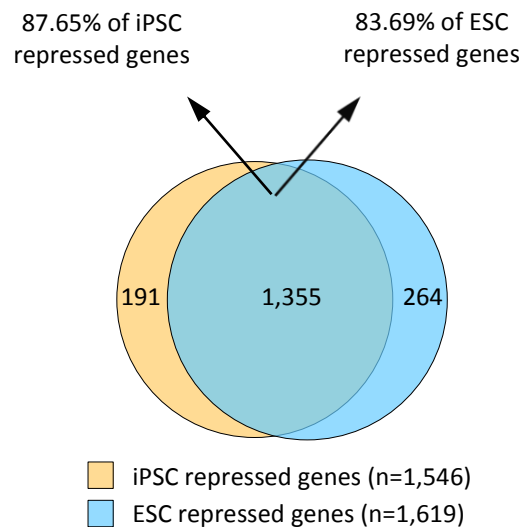





**Supplementary Table 10: qRT-PCR Primers**

|                  | SYMBOL      | SEARCH_KEY          | Forward Primer Sequence  | Reverse Primer Sequence   |
|------------------|-------------|---------------------|--------------------------|---------------------------|
| <b>Induced</b>   | LOC642559   | NM_203289.2         | agcgatcaagcagtggcta      | ccagaggaaaggacactggt      |
|                  | POU5F1P1    | NR_002304.1         | gaaaccacactgcagatca      | cggttacagaaccacactcg      |
|                  | LIN28       | NM_024674.3         | ggttccaggagacacacaa      | tactgtagcagggcaggaca      |
|                  | LOC643272   | XM_926633.1         | cactgccggttacactgttt     | tttgggatagcaccaagag       |
|                  | TACSTD1     | NM_002354.1         | gccaggtaaaagctcaaaggt    | gaacgtggaggctaaaggaa      |
|                  | ZIC2        | NM_007129.2         | cccagtcctctgacaaactgtgta | caaaaagcctttaaaccacctc    |
|                  | EPCAM       | NM_002354.2         | ccatgtgctggtgtgtgaa      | tgtgttttagttcaatgatgatcca |
|                  | RBPM52      | NM_194272.1         | tcacctaccaactgccact      | ggtaccagcgcacctgag        |
|                  | NNAT        | NM_005386.2         | gggtaggattcgcttttcg      | aacacctcacttctcgcaatg     |
|                  | APOE        | NM_000041.2         | ggtcgcttttgggattacct     | catggtctctccatcagc        |
| <b>Repressed</b> | CTSK        | NM_000396.2         | tgctgcatacacacagaaacac   | agaaggaagggtaggaggaga     |
|                  | COL6A3      | NM_057164.2         | gtgttctcggtgagcacctt     | aggtcagggtcgtgatgg        |
|                  | MFAP5       | NM_003480.2         | ggaccctaaaatgtcttctgct   | agttctatagctggcatagtcctca |
|                  | ACTA2       | NM_001613.1         | caccatcggaaatgaacgttt    | gactccatcccgatgaagga      |
|                  | THBS1       | NM_003246.2         | tgacaacaatcaggatattgatga | ttggcacataggagcagtt       |
|                  | BGN         | NM_001711.3         | ctcgtcctggtgaacaacaa     | cagggtggttcttgagatgtag    |
|                  | IGFBP3      | NM_001013398.1      | actgaggaaaggagctcacg     | actttgccagaccttcttg       |
|                  | TGFBI       | NM_000358.1         | cgagtgtgtcctggatag       | cccagggtctcgtaaaggtt      |
|                  | MT2A        | NM_005953.2         | aacctgtcccgactctagcc     | gcaggtgcaggagtcacc        |
| DAB2             | NM_001343.1 | tgagtcctttgccagtatt | gcatcaaagtcacatcatggtctg |                           |

**Supplementary videos 1,2:** C2C12 mouse myofibroblasts were seeded on 96-well plates in DMEM with 10% FBS, and myotube differentiation were initiated by switching to DMEM with 2% FBS for 3-4 days. The ESC-MNs (A) and iPSC-MNs (B) or were seeded on top of the differentiated myotubes with Motor Neuron Maintenance Medium. The MN-dependent contraction of myotubes was observed after 4 days of co-culture in both cell types. The videos were recorded using Leica DMI8 microscope.
